# Supplementary material for: LiCl-promoted-dehydration of fructose-based carbohydrates into 5-hydroxymethylfurfural in isopropanol
Source: Royal Society of Chemistry journal article supplement (doi:10.1039/d0ra08737h), 2021-01-01
Supplement: d0ra08737h1.pdf [file d0ra08737h1.pdf]

## **Electronic Supplementary Information**

### **LiCl-promoted-dehydration of fructose-based carbohydrates into 5-hydroxymethylfurfural in isopropanol**

Hao Ma,<sup>\*[a]</sup> Zhenzhen Li,<sup>[b]</sup> Yanhui Qiao,<sup>[a]</sup> and Junjiang Teng<sup>[a]</sup>

[a] College of Chemistry, Guangdong University of Petrochemical Technology, Maoming 525000, P. R. China

[b] School of Chemistry and Chemical Engineering, South China University of Technology, Guangzhou 510640, P. R. China

#### **Corresponding Author**

\*E-mail: [thma@gdupt.edu.cn](mailto:thma@gdupt.edu.cn) (H. Ma)

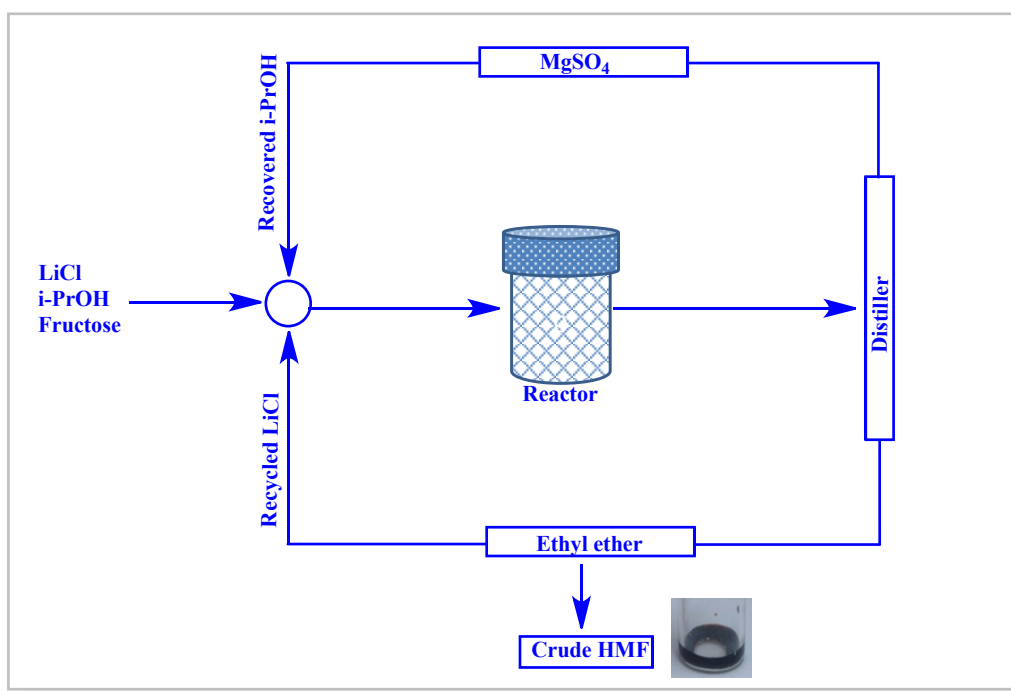

**Scheme S1.** The procedures for recycling of LiCl/*i*-PrOH system

#### Typical analysis procedure for the purity of isolated HMF

A certain amount of the isolated HMF ( $M_1$ , g) was diluted to 100 mL with deionized water for quantitative analysis on an Agilent 1200 HPLC system equipped with a C18 reversed phase column [250 × 4.6 mm, 5  $\mu$ m, 1:4 (v/v) CH<sub>3</sub>OH/H<sub>2</sub>O as the mobile phase at 0.6 mL/min] and a UV detector (284 nm). The HMF amount was determined through the external standard method using commercially available HMF standard. Purity of the isolated HMF ( $P_{\text{HMF}}$ , mol%) was calculated according to equation S1. The same process was repeated 3 times to minimize error.

$$P_{\text{HMF}}(\text{mol}\%) = \frac{m_{\text{HMF}} \times 126.11}{M_1} \times 100\% \quad (\text{S1})$$

where  $M_1$  is the mass (g) of isolated HMF used for purity analysis;  $m_{\text{HMF}}$  is the amount (mol) of HMF existed in the diluted solution (100 mL) from HPLC analysis; 126.11 is the molecular weight (g/mol) of HMF.

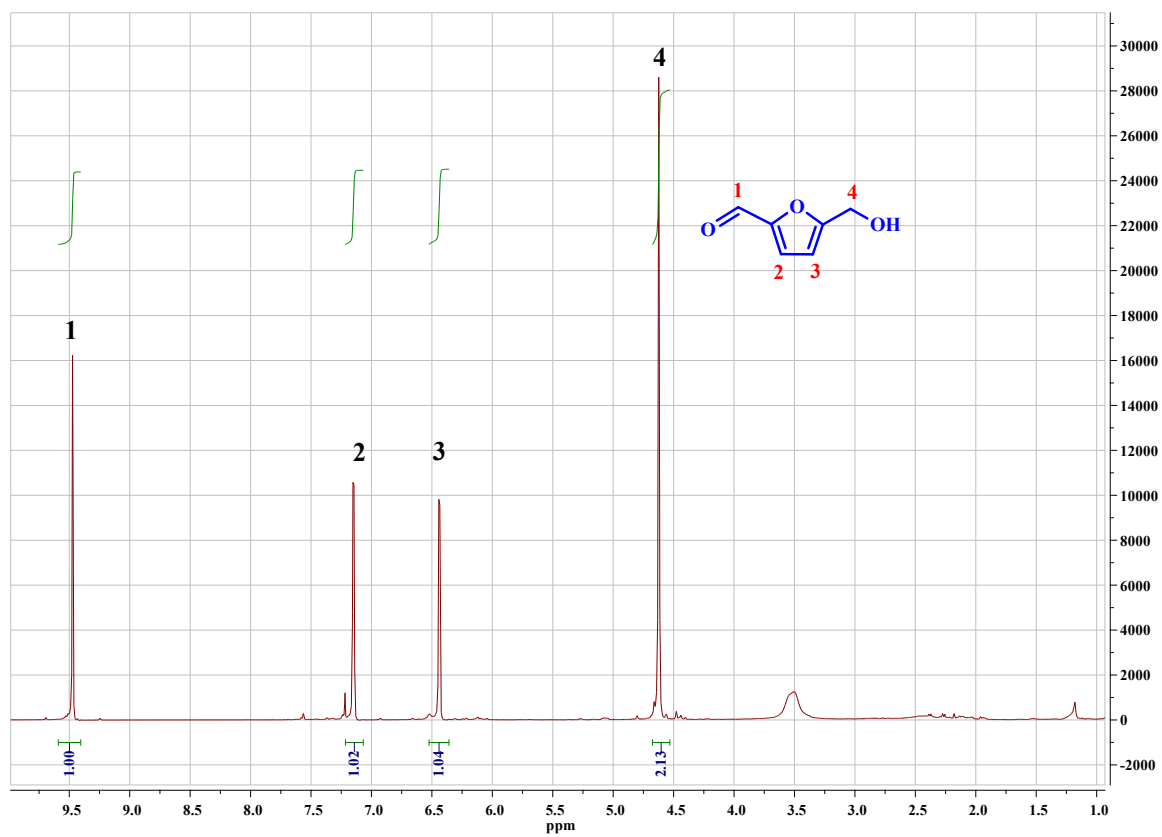

**Fig. S1** NMR spectrum of the isolated HMF (400 MHz, CDCl<sub>3</sub> as the solvent)

[ $\delta$  9.48 (s, 1H, CHO), 7.16 (d, 1H, CH), 6.45 (d, 1H, CH), 4.63 (s, 2H, CH<sub>2</sub>)]

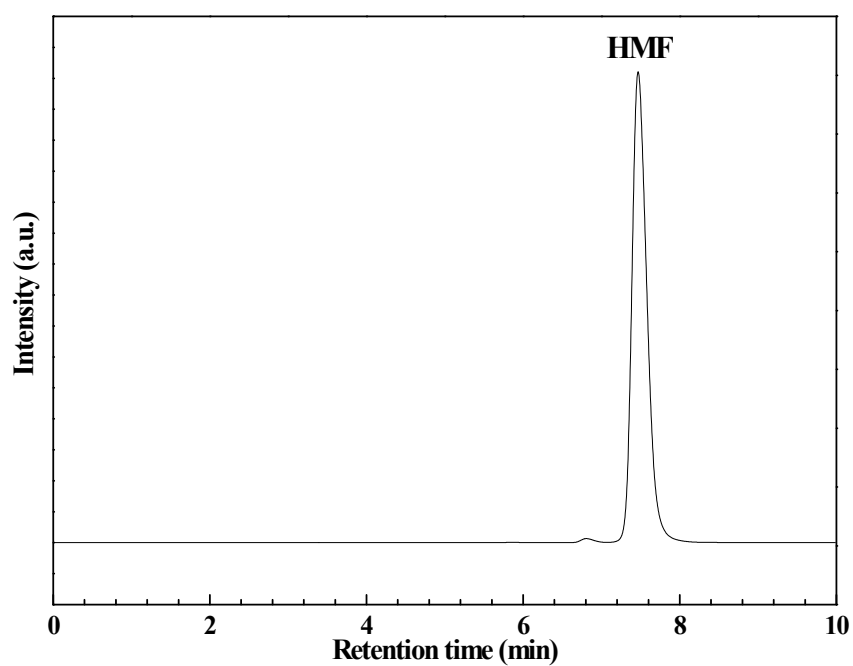

**Fig. S2** HPLC profile of the isolated HMF

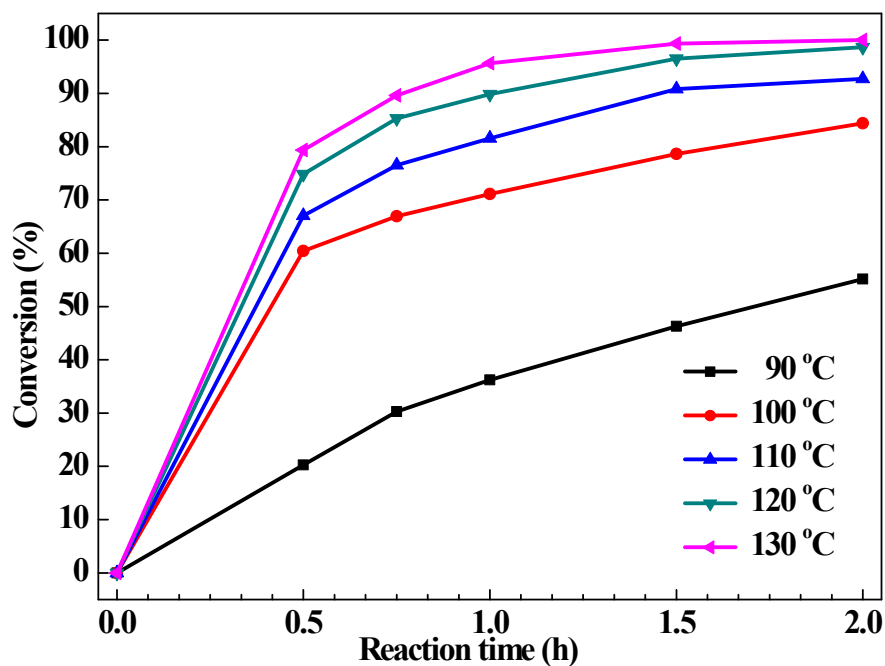

**Fig. S3** Effect of reaction temperature and time on the conversion of fructose (1.8 g of fructose (10 mmol), 0.42 g of LiCl (10 mmol), 10 mL of *i*-PrOH).

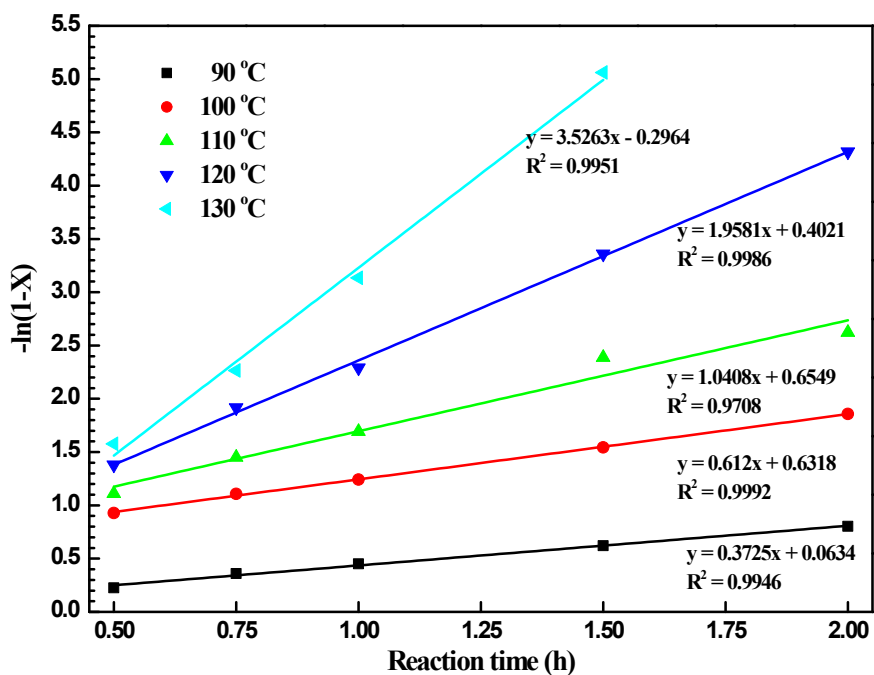

**Fig. S4.** Reaction rate constant of fructose decomposition at different temperature (1.8 g of fructose (10 mmol), 0.42 g of LiCl (10 mmol), 10 mL of *i*-PrOH).

$$X = \left(1 - \frac{\text{amount of residual fructose (mol)}}{\text{amount of feed fructose (mol)}}\right)$$

**Table S1** Activation energies and pre-exponential factors

| Parameter                                        | Values            |
|--------------------------------------------------|-------------------|
| Reaction order, $n$                              | 1.0               |
| Activation energy, $E_a$ (KJ·mol <sup>-1</sup> ) | 68.68             |
| Pre-exponential factor, $A$ (min <sup>-1</sup> ) | $1.2 \times 10^4$ |
| Correlation coefficient                          | 0.9941            |
